# Supplementary material
Source: PubMed Central journal article supplement (PMC9026593)
Supplement: NIHMS1793615-supplement-Supplemental_Material.pdf [file NIHMS1793615-supplement-Supplemental_Material.pdf]

## Supplemental Online Content

Goodwin JS, Li S, Hommel E, Nattinger AB, Kuo YF, Raji M. Association of inpatient continuity of care with complications and length of stay among hospitalized Medicare enrollees. *JAMA Netw Open*. 2021;4(8):e2120622.  
doi:10.1001/jamanetworkopen.2021.20622

**eFigure.** Cohort Selection

**eTable 1.** Odds of Adverse Effects of Medical Drugs

**eTable 2.** Odds of ICU Transfer for Admissions

**eTable 3.** Length of Stay for Admissions

This supplemental material has been provided by the authors to give readers additional information about their work.

**eFigure.** Cohort selection.

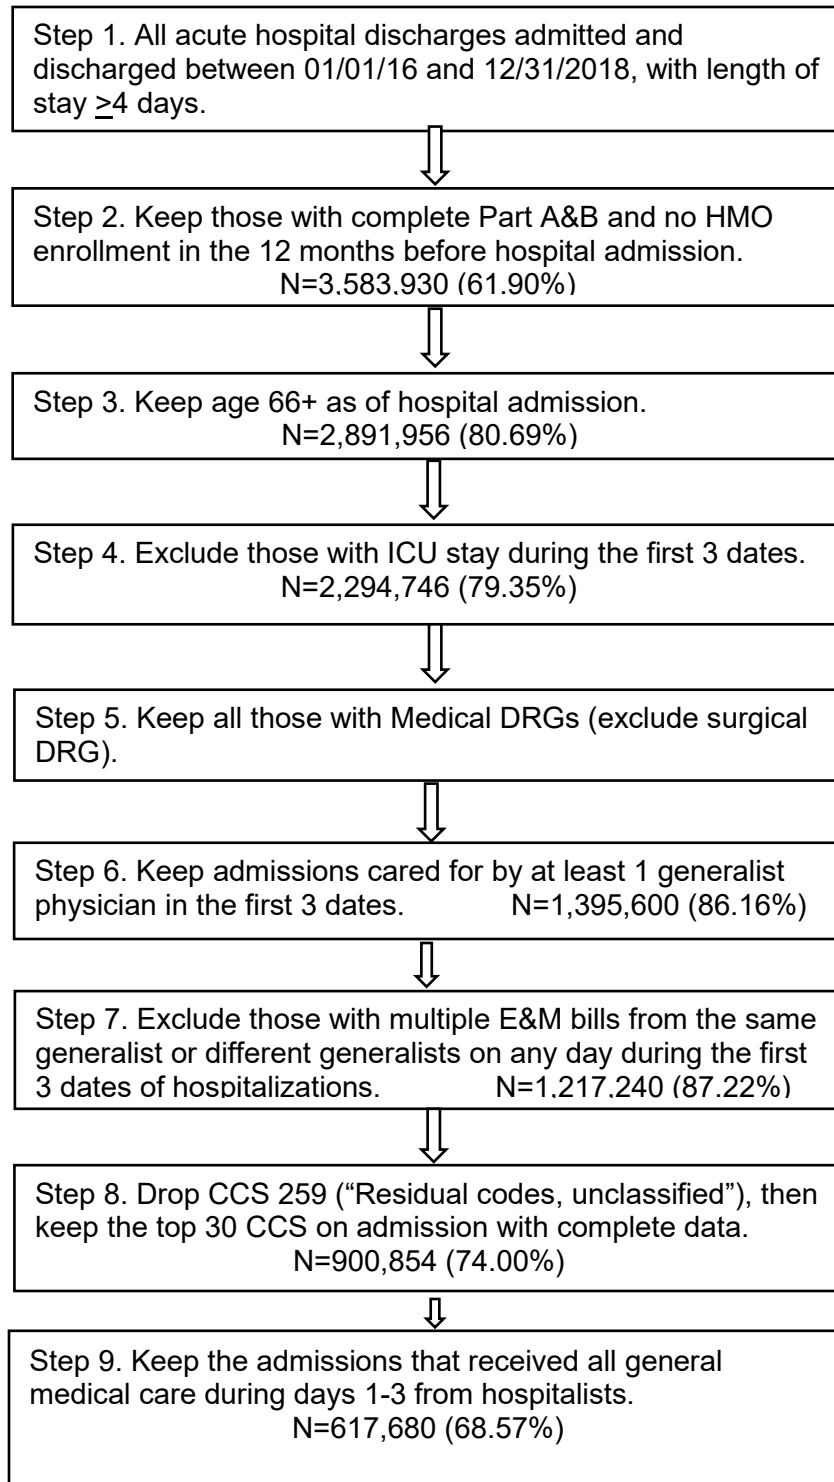

Abbreviations: ICU: intensive care unit; HMO, health maintenance organization; DRG, Diagnosis-related group; CCS, Clinical Classification Software; E&M, evaluation and management.

**Supplement Table e1. Odds of adverse effects of medical drugs<sup>a</sup>**

| Characteristic                                                                              | N (%)           | Observed rate | Odds Ratio* (95% Confidence Interval) |
|---------------------------------------------------------------------------------------------|-----------------|---------------|---------------------------------------|
| All                                                                                         | 617,680         | 7.3%          |                                       |
| # of hospitalists                                                                           |                 |               |                                       |
| 1                                                                                           | 306,037 (49.6%) | 7.0%          | Reference                             |
| 2                                                                                           | 274,658 (44.5%) | 7.6%          | 1.03 (1.01-1.05)                      |
| 3                                                                                           | 36,985 (6.0%)   | 7.9%          | 1.05 (1.01-1.10)                      |
| Age (Per year)                                                                              |                 |               |                                       |
| Q1 (>=66; <=73)                                                                             | 160,586 (26.0%) | 8.0%          | Reference                             |
| Q2 (>=74; <=80)                                                                             | 158,226 (25.6%) | 7.8%          | 0.95 (0.92-0.97)                      |
| Q3 (>=81; <=87)                                                                             | 160,506 (26.0%) | 7.2%          | 0.85 (0.83-0.88)                      |
| Q4 (>87)                                                                                    | 138,362 (22.4%) | 6.1%          | 0.71 (0.69-0.74)                      |
| Education (Percent of persons age 25+ in Zip area with high school education) (Per percent) |                 |               |                                       |
| Q1 (<=83.0)                                                                                 | 155,592 (25.2%) | 6.8%          | Reference                             |
| Q2 (>=83.1; <=89.0)                                                                         | 157,402 (25.5%) | 7.2%          | 1.02 (0.99-1.05)                      |
| Q3 (>=89.1; <=93.1)                                                                         | 151,328 (24.5%) | 7.5%          | 1.01 (0.98-1.05)                      |
| Q4 (>=93.2)                                                                                 | 153,358 (24.8%) | 7.9%          | 1.03 (0.99-1.07)                      |
| Year                                                                                        |                 |               |                                       |
| 2016                                                                                        | 195,558 (31.7%) | 7.3%          | Reference                             |
| 2017                                                                                        | 210,232 (34.0%) | 7.4%          | 1.02 (0.99-1.04)                      |
| 2018                                                                                        | 211,890 (34.3%) | 7.3%          | 1.01 (0.99-1.03)                      |
| Gender                                                                                      |                 |               |                                       |
| Male                                                                                        | 255,304 (41.3%) | 7.1%          | Reference                             |
| Female                                                                                      | 362,376 (58.7%) | 7.5%          | 1.13 (1.11-1.15)                      |
| Medicaid                                                                                    |                 |               |                                       |
| No                                                                                          | 484,979 (78.5%) | 7.6%          | Reference                             |
| Yes                                                                                         | 132,701 (21.5%) | 6.4%          | 0.92 (0.89-0.94)                      |
| Race                                                                                        |                 |               |                                       |
| White                                                                                       | 516,940 (83.7%) | 7.5%          | Reference                             |
| Black                                                                                       | 54,234 (8.8%)   | 6.2%          | 0.83 (0.80-0.87)                      |
| Hispanic                                                                                    | 26,701 (4.3%)   | 6.5%          | 0.94 (0.89-0.99)                      |
| Other                                                                                       | 19,805 (3.2%)   | 7.5%          | 1.01 (0.95-1.07)                      |
| Residence prior to hospitalization                                                          |                 |               |                                       |
| Community                                                                                   | 562,986 (91.2%) | 7.4%          | Reference                             |
| Nursing facility or other institutions                                                      | 54,694 (8.9%)   | 6.8%          | 1.01 (0.97-1.05)                      |
| Emergency hospitalization                                                                   |                 |               |                                       |
| No                                                                                          | 106,922 (17.3%) | 7.1%          | Reference                             |
| Yes                                                                                         | 510,758 (82.7%) | 7.4%          | 1.03 (0.99-1.06)                      |
| Weekend hospitalization                                                                     |                 |               |                                       |
| No                                                                                          | 438,932 (71.1%) | 7.3%          | Reference                             |
| Yes                                                                                         | 178,748 (28.9%) | 7.3%          | 1.00 (0.98-1.02)                      |

| Characteristic                                                      | N (%)          | Observed rate | Odds Ratio* (95% Confidence Interval) |
|---------------------------------------------------------------------|----------------|---------------|---------------------------------------|
| CCS on admission                                                    |                |               |                                       |
| 102 Nonspecific chest pain                                          | 17,141 (2.8%)  | 6.0%          | Reference                             |
| 106 Cardiac dysrhythmias                                            | 16,672 (2.7%)  | 8.0%          | 1.28 (1.17-1.39)                      |
| 108 Congestive heart failure; nonhypertensive                       | 29,343 (4.8%)  | 6.7%          | 1.15 (1.06-1.24)                      |
| 109 Acute cerebrovascular disease                                   | 14,757 (2.4%)  | 3.5%          | 0.54 (0.49-0.61)                      |
| 122 Pneumonia                                                       | 43,118 (7.0%)  | 6.1%          | 1.04 (0.96-1.12)                      |
| 127 Chronic obstructive pulmonary disease and bronchiectasis        | 23,103 (3.7%)  | 9.5%          | 1.59 (1.47-1.72)                      |
| 131 Respiratory failure; insufficiency                              | 11,916 (1.9%)  | 8.6%          | 1.43 (1.30-1.57)                      |
| 133 Other lower respiratory disease                                 | 88,615 (14.5%) | 7.6%          | 1.27 (1.18-1.36)                      |
| 145 Intestinal obstruction without hernia                           | 8,821 (1.4%)   | 4.7%          | 0.71 (0.63-0.80)                      |
| 153 Gastrointestinal hemorrhage                                     | 24,940 (4.0%)  | 8.8%          | 1.52 (1.41-1.64)                      |
| 155 Other gastrointestinal disorders                                | 11,586 (1.9%)  | 8.7%          | 1.45 (1.32-1.59)                      |
| 157 Acute and unspecified renal failure                             | 20,443 (3.3%)  | 11.2%         | 2.03 (1.88-2.20)                      |
| 159 Urinary tract infections                                        | 32,008 (5.2%)  | 4.2%          | 0.73 (0.67-0.80)                      |
| 163 Genitourinary symptoms and ill-defined conditions               | 5,556 (0.9%)   | 9.4%          | 1.68 (1.51-1.88)                      |
| 197 Skin and subcutaneous tissue infections                         | 19,716 (3.2%)  | 5.5%          | 0.89 (0.81-0.97)                      |
| 2 Other skin disorders                                              | 38,449 (6.2%)  | 5.3%          | 0.87 (0.81-0.94)                      |
| 204 Other non-traumatic joint disorders                             | 8,260 (1.3%)   | 6.8%          | 1.12 (1.02-1.24)                      |
| 205 Spondylosis; intervertebral disc disorders; other back problems | 9,428 (1.5%)   | 9.6%          | 1.55 (1.41-1.71)                      |
| 211 Other connective tissue disease                                 | 13,292 (2.2%)  | 6.8%          | 1.12 (1.02-1.23)                      |
| Characteristic                                                      | N (%)          | Observed rate | Odds Ratio* (95% Confidence Interval) |
| 231 Other fractures                                                 | 10,181 (1.7%)  | 6.6%          | 1.10 (0.99-1.22)                      |

|                                                               |                 |                      |                                              |
|---------------------------------------------------------------|-----------------|----------------------|----------------------------------------------|
| 245 Syncope                                                   | 16,212 (2.6%)   | 8.6%                 | 1.50 (1.38-1.64)                             |
| 246 Fever of unknown origin                                   | 16,008 (2.6%)   | 6.8%                 | 1.10 (1.01-1.20)                             |
| 250 Nausea and vomiting                                       | 10,747 (1.7%)   | 8.7%                 | 1.45 (1.32-1.59)                             |
| 251 Abdominal pain                                            | 25,465 (4.1%)   | 6.3%                 | 1.00 (0.92-1.08)                             |
| 252 Malaise and fatigue                                       | 39,663 (6.4%)   | 7.7%                 | 1.32 (1.23-1.42)                             |
| 55 Fluid and electrolyte disorders                            | 21,442 (3.5%)   | 10.8%                | 1.97 (1.83-2.13)                             |
| 59 Deficiency and other anemia                                | 7,376 (1.2%)    | 7.9%                 | 1.39 (1.24-1.54)                             |
| 93 Conditions associated with dizziness or vertigo            | 6,343 (1.0%)    | 8.8%                 | 1.44 (1.29-1.61)                             |
| 95 Other nervous system disorders                             | 14,815 (2.4%)   | 10.1%                | 1.76 (1.62-1.92)                             |
| 99 Hypertension with complications and secondary hypertension | 12,264 (2.0%)   | 6.6%                 | 1.15 (1.04-1.26)                             |
| Elixhauser comorbidity                                        |                 |                      |                                              |
| Alcohol abuse                                                 |                 |                      |                                              |
| No                                                            | 601,762 (97.4%) | 7.3%                 | Reference                                    |
| Yes                                                           | 15,918 (2.6%)   | 6.5%                 | 0.93 (0.87-0.99)                             |
| Cardiac Arrhythmia                                            |                 |                      |                                              |
| No                                                            | 331,189 (53.6%) | 7.3%                 | Reference                                    |
| Yes                                                           | 286,491 (46.4%) | 7.3%                 | 1.11 (1.08-1.13)                             |
| Blood Loss Anemia                                             |                 |                      |                                              |
| No                                                            | 591,125 (95.7%) | 7.4%                 | Reference                                    |
| Yes                                                           | 26,555 (4.3%)   | 5.8%                 | 0.83 (0.78-0.87)                             |
| Congestive Heart Failure                                      |                 |                      |                                              |
| No                                                            | 379,969 (61.5%) | 7.6%                 | Reference                                    |
| Yes                                                           | 237,711 (38.5%) | 6.8%                 | 0.98 (0.96-1.01)                             |
| Chronic Pulmonary Disease                                     |                 |                      |                                              |
| No                                                            | 376,634 (61.0%) | 7.3%                 | Reference                                    |
| Yes                                                           | 241,046 (39.0%) | 7.4%                 | 1.06 (1.03-1.08)                             |
| Coagulopathy                                                  |                 |                      |                                              |
| No                                                            | 553,501 (89.6%) | 7.4%                 | Reference                                    |
| Yes                                                           | 64,179 (10.4%)  | 6.8%                 | 0.96 (0.93-0.99)                             |
| Deficiency Anemia                                             |                 |                      |                                              |
| No                                                            | 510,324 (82.6%) | 7.5%                 | Reference                                    |
| Yes                                                           | 107,358 (17.4%) | 6.3%                 | 0.89 (0.87-0.92)                             |
| Depression                                                    |                 |                      |                                              |
| No                                                            | 459,295 (74.4%) | 7.6%                 | Reference                                    |
| Characteristic                                                | <b>N (%)</b>    | <b>Observed rate</b> | <b>Odds Ratio* (95% Confidence Interval)</b> |
| Yes                                                           | 158,385 (25.6%) | 6.5%                 | 0.91 (0.88-0.93)                             |
| Diabetes Complicated                                          |                 |                      |                                              |
| No                                                            | 441,206 (71.4%) | 7.5%                 | Reference                                    |

|                                         |                 |                      |                                              |
|-----------------------------------------|-----------------|----------------------|----------------------------------------------|
| Yes                                     | 176,474 (28.6%) | 6.9%                 | 0.96 (0.93-0.99)                             |
| Diabetes Uncomplicated                  |                 |                      |                                              |
| No                                      | 389,910 (63.1%) | 7.5%                 | Reference                                    |
| Yes                                     | 227,770 (36.9%) | 7.1%                 | 1.01 (0.98-1.04)                             |
| Drug Abuse                              |                 |                      |                                              |
| No                                      | 602,863 (97.6%) | 7.3%                 | Reference                                    |
| Yes                                     | 14,817 (2.4%)   | 7.0%                 | 1.02 (0.96-1.09)                             |
| Fluid and Electrolyte Disorders         |                 |                      |                                              |
| No                                      | 370,102 (59.9%) | 7.8%                 | Reference                                    |
| Yes                                     | 247,578 (40.1%) | 6.6%                 | 0.87 (0.85-0.89)                             |
| AIDS/HIV                                |                 |                      |                                              |
| No                                      | 616,801 (99.9%) | 7.3%                 | Reference                                    |
| Yes                                     | 879 (0.1%)      | 7.4%                 | 1.13 (0.88-1.47)                             |
| Hypertension complicated                |                 |                      |                                              |
| No                                      | 389,947 (63.1%) | 7.7%                 | Reference                                    |
| Yes                                     | 227,733 (36.9%) | 6.7%                 | 0.92 (0.90-0.95)                             |
| Hypertension Uncomplicated              |                 |                      |                                              |
| No                                      | 104,392 (16.9%) | 7.3%                 | Reference                                    |
| Yes                                     | 513,288 (83.1%) | 7.3%                 | 1.11 (1.08-1.14)                             |
| Hypothyroidism                          |                 |                      |                                              |
| No                                      | 450,545 (72.9%) | 7.3%                 | Reference                                    |
| Yes                                     | 167,135 (27.1%) | 7.2%                 | 1.02 (0.99-1.04)                             |
| Liver Disease                           |                 |                      |                                              |
| No                                      | 583,796 (94.5%) | 7.3%                 | Reference                                    |
| Yes                                     | 33,884 (5.5%)   | 7.0%                 | 0.95 (0.91-0.99)                             |
| Lymphoma                                |                 |                      |                                              |
| No                                      | 603,924 (97.8%) | 7.2%                 | Reference                                    |
| Yes                                     | 13,756 (2.2%)   | 10.6%                | 1.47 (1.39-1.56)                             |
| Metastatic Cancer                       |                 |                      |                                              |
| No                                      | 590,033 (95.5%) | 7.1%                 | Reference                                    |
| Yes                                     | 27,647 (4.5%)   | 11.8%                | 1.55 (1.48-1.63)                             |
| Obesity                                 |                 |                      |                                              |
| No                                      | 514,524 (83.3%) | 7.3%                 | Reference                                    |
| Yes                                     | 103,156 (16.7%) | 7.4%                 | 1.01 (0.98-1.04)                             |
| Other Neurological Disorders            |                 |                      |                                              |
| No                                      | 501,296 (81.2%) | 7.7%                 | Reference                                    |
| Yes                                     | 116,384 (18.8%) | 5.7%                 | 0.83 (0.80-0.85)                             |
| Pulmonary Circulation Disorders         |                 |                      |                                              |
| No                                      | 539,536 (87.4%) | 7.3%                 | Reference                                    |
| Characteristic                          | <b>N (%)</b>    | <b>Observed rate</b> | <b>Odds Ratio* (95% Confidence Interval)</b> |
| Yes                                     | 78,144 (12.6%)  | 7.2%                 | 1.01 (0.97-1.04)                             |
| Peptic Ulcer Disease excluding bleeding |                 |                      |                                              |

|                                |                 |                      |                                              |
|--------------------------------|-----------------|----------------------|----------------------------------------------|
| No                             | 604,641 (97.9%) | 7.3%                 | Reference                                    |
| Yes                            | 13,039 (2.1%)   | 6.1%                 | 0.93 (0.86-1.00)                             |
| Peripheral Vascular Disorders  |                 |                      |                                              |
| No                             | 434,811 (70.4%) | 7.6%                 | Reference                                    |
| Yes                            | 182,869 (29.6%) | 6.6%                 | 0.93 (0.91-0.96)                             |
| Paralysis                      |                 |                      |                                              |
| No                             | 598,131 (96.8%) | 7.4%                 | Reference                                    |
| Yes                            | 19,549 (3.2%)   | 5.4%                 | 0.87 (0.81-0.93)                             |
| Psychoses                      |                 |                      |                                              |
| No                             | 600,389 (97.2%) | 7.4%                 | Reference                                    |
| Yes                            | 17,291 (2.8%)   | 5.2%                 | 0.85 (0.79-0.91)                             |
| Renal Failure                  |                 |                      |                                              |
| No                             | 401,389 (64.9%) | 7.6%                 | Reference                                    |
| Yes                            | 216,291 (35.1%) | 6.8%                 | 1.03 (0.99-1.06)                             |
| Weight Loss                    |                 |                      |                                              |
| No                             | 542,299 (87.8%) | 7.6%                 | Reference                                    |
| Yes                            | 75,381 (12.2%)  | 5.6%                 | 0.76 (0.74-0.79)                             |
| Valvular Disease               |                 |                      |                                              |
| No                             | 485,214 (78.6%) | 7.4%                 | Reference                                    |
| Yes                            | 132,466 (21.4%) | 7.2%                 | 1.02 (0.99-1.05)                             |
| Solid Tumor without Metastasis |                 |                      |                                              |
| No                             | 524,918 (85.0%) | 7.0%                 | Reference                                    |
| Yes                            | 92,762 (15.0%)  | 8.9%                 | 1.12 (1.09-1.16)                             |
| Rheumatoid Arthritis/collagen  |                 |                      |                                              |
| No                             | 569,670 (92.2%) | 7.3%                 | Reference                                    |
| Yes                            | 48,010 (7.8%)   | 7.8%                 | 1.08 (1.04-1.11)                             |
| Hospital Characteristic        |                 |                      |                                              |
| Bed Size                       |                 |                      |                                              |
| >500                           | 158.306 (25.6%) | 7.4%                 | Reference                                    |
| 350<, <=500                    | 100.925 (16.3%) | 7.8%                 | 1.04 (0.97-1.12)                             |
| 200<, <=350                    | 172.408 (27.9%) | 7.6%                 | 1.05 (0.98-1.14)                             |
| <=200                          | 186.041 (30.1%) | 6.7%                 | 0.93 (0.87-1.01)                             |
| Urban Rural indicator          |                 |                      |                                              |
| Rural                          | 93.573 (15.2%)  | 6.0%                 | Reference                                    |
| Urban                          | 524.107 (84.8%) | 7.5%                 | 1.33 (1.26-1.41)                             |
| Type of provider               |                 |                      |                                              |
| Nonprofit                      | 460.368 (74.6%) | 7.5%                 | Reference                                    |
| For profit                     | 81.732 (13.2%)  | 6.5%                 | 0.89 (0.84-0.94)                             |
| Government                     | 75.580 (12.2%)  | 6.8%                 | 0.86 (0.81-0.91)                             |
| Characteristic                 | <b>N (%)</b>    | <b>Observed rate</b> | <b>Odds Ratio* (95% Confidence Interval)</b> |
| Major                          | 121.922 (19.7%) | 7.6%                 | Reference                                    |
| Limited                        | 130.339 (21.1%) | 7.5%                 | 1.01 (0.94-1.09)                             |
| Graduate                       | 29.110 (4.7%)   | 7.7%                 | 1.00 (0.89-1.11)                             |
| No affiliation                 | 336,309 (54.5%) | 7.1%                 | 0.96 (0.90-1.03)                             |

SD, standard deviation; CCS, Clinical Classification Software; AIDS, acquired immune deficiency syndrome; HIV, human immunodeficiency virus.

<sup>a</sup> Odds of adverse effect of medical drugs for admissions on day 4 or later as a function of the number of hospitalists providing care during the first 3 days of hospitalization, adjusted for patient characteristics and hospital characteristics, from a **two level multivariable** (01/01/2016-12/31/2018, 20% National Medicare data).



**Supplement Table e2. Odds of ICU Transfer for Admissions<sup>a</sup>**

| Characteristic                                                                              | N (%)           | Observed rate | Odds Ratio* (95% Confidence Interval) |
|---------------------------------------------------------------------------------------------|-----------------|---------------|---------------------------------------|
| All                                                                                         | 617,680         | 1.9%          |                                       |
| # of generalists                                                                            |                 |               |                                       |
| 1                                                                                           | 306,037 (49.6%) | 1.9%          | Reference                             |
| 2                                                                                           | 274,658 (44.5%) | 1.9%          | 1.02 (0.98-1.06)                      |
| 3                                                                                           | 36,985 (6.0%)   | 2.0%          | 1.03 (0.95-1.12)                      |
| Age (Per year)                                                                              |                 |               |                                       |
| Q1 (>=66; <=73)                                                                             | 160,586 (26.0%) | 2.2%          | Reference                             |
| Q2 (>=74; <=80)                                                                             | 158,226 (25.6%) | 2.2%          | 0.97 (0.92-1.02)                      |
| Q3 (>=81; <=87)                                                                             | 160,506 (26.0%) | 1.8%          | 0.82 (0.77-0.86)                      |
| Q4 (>87)                                                                                    | 138,362 (22.4%) | 1.4%          | 0.66 (0.62-0.70)                      |
| Education (Percent of persons age 25+ in Zip area with high school education) (Per percent) |                 |               |                                       |
| Q1 (<=83.0)                                                                                 | 155,592 (25.2%) | 2.0%          | Reference                             |
| Q2 (>=83.1; <=89.0)                                                                         | 157,402 (25.5%) | 1.9%          | 0.98 (0.93-1.04)                      |
| Q3 (>=89.1; <=93.1)                                                                         | 151,328 (24.5%) | 1.9%          | 0.96 (0.91-1.02)                      |
| Q4 (>=93.2)                                                                                 | 153,358 (24.8%) | 1.9%          | 0.97 (0.91-1.02)                      |
| Year                                                                                        |                 |               |                                       |
| 2016                                                                                        | 195,558 (31.7%) | 1.9%          | Reference                             |
| 2017                                                                                        | 210,232 (34.0%) | 1.9%          | 1.01 (0.96-1.06)                      |
| 2018                                                                                        | 211,890 (34.3%) | 1.9%          | 0.98 (0.93-1.02)                      |
| Gender                                                                                      |                 |               |                                       |
| Male                                                                                        | 255,304 (41.3%) | 2.2%          | Reference                             |
| Female                                                                                      | 362,376 (58.7%) | 1.7%          | 0.84 (0.81-0.88)                      |
| Medicaid                                                                                    |                 |               |                                       |
| No                                                                                          | 484,979 (78.5%) | 1.9%          | Reference                             |
| Yes                                                                                         | 132,701 (21.5%) | 2.0%          | 0.98 (0.93-1.03)                      |
| Race                                                                                        |                 |               |                                       |
| White                                                                                       | 516,940 (83.7%) | 1.9%          | Reference                             |
| Black                                                                                       | 54,234 (8.8%)   | 2.2%          | 1.08 (1.01-1.15)                      |
| Hispanic                                                                                    | 26,701 (4.3%)   | 2.2%          | 1.12 (1.02-1.23)                      |
| Other                                                                                       | 19,805 (3.2%)   | 2.2%          | 1.08 (0.98-1.17)                      |
| Residence prior to hospitalization                                                          |                 |               |                                       |
| Community                                                                                   | 562,986 (91.2%) | 1.9%          | Reference                             |
| Nursing facility or other institutions                                                      | 54,694 (8.9%)   | 2.3%          | 1.27 (1.19-1.36)                      |
| Emergency hospitalization                                                                   |                 |               |                                       |
| No                                                                                          | 106,922 (17.3%) | 1.7%          | Reference                             |
| Yes                                                                                         | 510,758 (82.7%) | 1.9%          | 1.13 (1.07-1.19)                      |
| Weekend hospitalization                                                                     |                 |               |                                       |
| No                                                                                          | 438,932 (71.1%) | 1.9%          | Reference                             |
| Yes                                                                                         | 178,748 (28.9%) | 1.8%          | 0.96 (0.92-0.99)                      |

| Characteristic                                                      | N (%)          | Observed rate | Odds Ratio* (95% Confidence Interval) |
|---------------------------------------------------------------------|----------------|---------------|---------------------------------------|
| CCS on admission                                                    |                |               |                                       |
| 102 Nonspecific chest pain                                          | 17,141 (2.8%)  | 1.6%          | Reference                             |
| 106 Cardiac dysrhythmias                                            | 16,672 (2.7%)  | 1.9%          | 1.34 (1.14-1.58)                      |
| 108 Congestive heart failure; nonhypertensive                       | 29,343 (4.8%)  | 2.1%          | 1.33 (1.15-1.54)                      |
| 109 Acute cerebrovascular disease                                   | 14,757 (2.4%)  | 1.7%          | 1.31 (1.10-1.56)                      |
| 122 Pneumonia                                                       | 43,118 (7.0%)  | 2.3%          | 1.68 (1.47-1.93)                      |
| 127 Chronic obstructive pulmonary disease and bronchiectasis        | 23,103 (3.7%)  | 1.7%          | 1.11 (0.95-1.30)                      |
| 131 Respiratory failure; insufficiency                              | 11,916 (1.9%)  | 4.1%          | 2.77 (2.37-3.22)                      |
| 133 Other lower respiratory disease                                 | 88,615 (14.5%) | 2.4%          | 1.52 (1.34-1.73)                      |
| 145 Intestinal obstruction without hernia                           | 8,821 (1.4%)   | 1.5%          | 1.08 (0.88-1.34)                      |
| 153 Gastrointestinal hemorrhage                                     | 24,940 (4.0%)  | 1.6%          | 1.04 (0.89-1.21)                      |
| 155 Other gastrointestinal disorders                                | 11,586 (1.9%)  | 2.1%          | 1.44 (1.21-1.72)                      |
| 157 Acute and unspecified renal failure                             | 20,443 (3.3%)  | 2.0%          | 1.32 (1.13-1.55)                      |
| 159 Urinary tract infections                                        | 32,008 (5.2%)  | 1.0%          | 0.72 (0.61-0.85)                      |
| 163 Genitourinary symptoms and ill-defined conditions               | 5,556 (0.9%)   | 1.2%          | 0.80 (0.61-1.05)                      |
| 197 Skin and subcutaneous tissue infections                         | 19,716 (3.2%)  | 0.9%          | 0.59 (0.48-0.71)                      |
| 2 Other skin disorders                                              | 38,449 (6.2%)  | 2.9%          | 2.06 (1.80-2.36)                      |
| 204 Other non-traumatic joint disorders                             | 8,260 (1.3%)   | 1.1%          | 0.86 (0.67-1.09)                      |
| 205 Spondylosis; intervertebral disc disorders; other back problems | 9,428 (1.5%)   | 1.4%          | 1.02 (0.82-1.26)                      |
| 211 Other connective tissue disease                                 | 13,292 (2.2%)  | 1.1%          | 0.81 (0.66-0.98)                      |
| Characteristic                                                      | N (%)          | Observed rate | Odds Ratio* (95% Confidence Interval) |
| 231 Other fractures                                                 | 10,181 (1.7%)  | 1.2%          | 0.96 (0.77-1.20)                      |

|                                                               |                 |                      |                                              |
|---------------------------------------------------------------|-----------------|----------------------|----------------------------------------------|
| 245 Syncope                                                   | 16,212 (2.6%)   | 1.3%                 | 0.92 (0.77-1.11)                             |
| 246 Fever of unknown origin                                   | 16,008 (2.6%)   | 1.9%                 | 1.27 (1.08-1.50)                             |
| 250 Nausea and vomiting                                       | 10,747 (1.7%)   | 1.8%                 | 1.28 (1.06-1.54)                             |
| 251 Abdominal pain                                            | 25,465 (4.1%)   | 1.7%                 | 1.15 (0.98-1.33)                             |
| 252 Malaise and fatigue                                       | 39,663 (6.4%)   | 1.7%                 | 1.21 (1.05-1.40)                             |
| 55 Fluid and electrolyte disorders                            | 21,442 (3.5%)   | 1.9%                 | 1.31 (1.12-1.53)                             |
| 59 Deficiency and other anemia                                | 7,376 (1.2%)    | 1.6%                 | 1.00 (0.81-1.25)                             |
| 93 Conditions associated with dizziness or vertigo            | 6,343 (1.0%)    | 1.1%                 | 0.76 (0.58-0.99)                             |
| 95 Other nervous system disorders                             | 14,815 (2.4%)   | 1.7%                 | 1.17 (0.98-1.40)                             |
| 99 Hypertension with complications and secondary hypertension | 12,264 (2.0%)   | 2.2%                 | 1.35 (1.13-1.60)                             |
| Elixhauser comorbidity                                        |                 |                      |                                              |
| Alcohol abuse                                                 |                 |                      |                                              |
| No                                                            | 601,762 (97.4%) | 1.9%                 | Reference                                    |
| Yes                                                           | 15,918 (2.6%)   | 2.6%                 | 1.07 (0.97-1.19)                             |
| Cardiac Arrhythmia                                            |                 |                      |                                              |
| No                                                            | 331,189 (53.6%) | 1.7%                 | Reference                                    |
| Yes                                                           | 286,491 (46.4%) | 2.2%                 | 1.11 (1.06-1.16)                             |
| Blood Loss Anemia                                             |                 |                      |                                              |
| No                                                            | 591,125 (95.7%) | 1.9%                 | Reference                                    |
| Yes                                                           | 26,555 (4.3%)   | 2.4%                 | 1.03 (0.94-1.12)                             |
| Congestive Heart Failure                                      |                 |                      |                                              |
| No                                                            | 379,969 (61.5%) | 1.6%                 | Reference                                    |
| Yes                                                           | 237,711 (38.5%) | 2.3%                 | 1.17 (1.11-1.23)                             |
| Chronic Pulmonary Disease                                     |                 |                      |                                              |
| No                                                            | 376,634 (61.0%) | 1.7%                 | Reference                                    |
| Yes                                                           | 241,046 (39.0%) | 2.3%                 | 1.10 (1.06-1.15)                             |
| Coagulopathy                                                  |                 |                      |                                              |
| No                                                            | 553,501 (89.6%) | 1.8%                 | Reference                                    |
| Yes                                                           | 64,179 (10.4%)  | 2.6%                 | 1.13 (1.06-1.19)                             |
| Deficiency Anemia                                             |                 |                      |                                              |
| No                                                            | 510,324 (82.6%) | 1.8%                 | Reference                                    |
| Yes                                                           | 107,358 (17.4%) | 2.3%                 | 1.03 (0.98-1.08)                             |
| Depression                                                    |                 |                      |                                              |
| No                                                            | 459,295 (74.4%) | 1.9%                 | Reference                                    |
| Characteristic                                                | <b>N (%)</b>    | <b>Observed rate</b> | <b>Odds Ratio* (95% Confidence Interval)</b> |
| Yes                                                           | 158,385 (25.6%) | 1.9%                 | 0.88 (0.84-0.92)                             |
| Diabetes Complicated                                          |                 |                      |                                              |
| No                                                            | 441,206 (71.4%) | 1.8%                 | Reference                                    |

|                                         |                 |                      |                                              |
|-----------------------------------------|-----------------|----------------------|----------------------------------------------|
| Yes                                     | 176,474 (28.6%) | 2.2%                 | 1.03 (0.97-1.09)                             |
| Diabetes Uncomplicated                  |                 |                      |                                              |
| No                                      | 389,910 (63.1%) | 1.8%                 | Reference                                    |
| Yes                                     | 227,770 (36.9%) | 2.1%                 | 0.98 (0.93-1.03)                             |
| Drug Abuse                              |                 |                      |                                              |
| No                                      | 602,863 (97.6%) | 1.9%                 | Reference                                    |
| Yes                                     | 14,817 (2.4%)   | 2.1%                 | 0.90 (0.80-1.02)                             |
| Fluid and Electrolyte Disorders         |                 |                      |                                              |
| No                                      | 370,102 (59.9%) | 1.7%                 | Reference                                    |
| Yes                                     | 247,578 (40.1%) | 2.2%                 | 1.08 (1.03-1.13)                             |
| AIDS/HIV                                |                 |                      |                                              |
| No                                      | 616,801 (99.9%) | 1.9%                 | Reference                                    |
| Yes                                     | 879 (0.1%)      | 2.4%                 | 0.89 (0.57-1.38)                             |
| Hypertension complicated                |                 |                      |                                              |
| No                                      | 389,947 (63.1%) | 1.7%                 | Reference                                    |
| Yes                                     | 227,733 (36.9%) | 2.3%                 | 1.01 (0.95-1.06)                             |
| Hypertension Uncomplicated              |                 |                      |                                              |
| No                                      | 104,392 (16.9%) | 1.8%                 | Reference                                    |
| Yes                                     | 513,288 (83.1%) | 1.9%                 | 0.89 (0.85-0.94)                             |
| Hypothyroidism                          |                 |                      |                                              |
| No                                      | 450,545 (72.9%) | 1.9%                 | Reference                                    |
| Yes                                     | 167,135 (27.1%) | 1.9%                 | 0.98 (0.94-1.03)                             |
| Liver Disease                           |                 |                      |                                              |
| No                                      | 583,796 (94.5%) | 1.9%                 | Reference                                    |
| Yes                                     | 33,884 (5.5%)   | 2.6%                 | 1.10 (1.02-1.19)                             |
| Lymphoma                                |                 |                      |                                              |
| No                                      | 603,924 (97.8%) | 1.9%                 | Reference                                    |
| Yes                                     | 13,756 (2.2%)   | 2.5%                 | 1.12 (1.01-1.25)                             |
| Metastatic Cancer                       |                 |                      |                                              |
| No                                      | 590,033 (95.5%) | 1.9%                 | Reference                                    |
| Yes                                     | 27,647 (4.5%)   | 2.7%                 | 1.23 (1.12-1.34)                             |
| Obesity                                 |                 |                      |                                              |
| No                                      | 514,524 (83.3%) | 1.8%                 | Reference                                    |
| Yes                                     | 103,156 (16.7%) | 2.2%                 | 0.98 (0.93-1.03)                             |
| Other Neurological Disorders            |                 |                      |                                              |
| No                                      | 501,296 (81.2%) | 1.9%                 | Reference                                    |
| Yes                                     | 116,384 (18.8%) | 2.1%                 | 1.00 (0.94-1.04)                             |
| Pulmonary Circulation Disorders         |                 |                      |                                              |
| No                                      | 539,536 (87.4%) | 1.8%                 | Reference                                    |
| Characteristic                          | <b>N (%)</b>    | <b>Observed rate</b> | <b>Odds Ratio* (95% Confidence Interval)</b> |
| Yes                                     | 78,144 (12.6%)  | 2.7%                 | 1.18 (1.12-1.24)                             |
| Peptic Ulcer Disease excluding bleeding |                 |                      |                                              |

|                                |                 |                      |                                              |
|--------------------------------|-----------------|----------------------|----------------------------------------------|
| No                             | 604,641 (97.9%) | 1.9%                 | Reference                                    |
| Yes                            | 13,039 (2.1%)   | 2.2%                 | 0.96 (0.85-1.09)                             |
| Peripheral Vascular Disorders  |                 |                      |                                              |
| No                             | 434,811 (70.4%) | 1.8%                 | Reference                                    |
| Yes                            | 182,869 (29.6%) | 2.1%                 | 1.02 (0.98-1.06)                             |
| Paralysis                      |                 |                      |                                              |
| No                             | 598,131 (96.8%) | 1.9%                 | Reference                                    |
| Yes                            | 19,549 (3.2%)   | 2.3%                 | 1.08 (0.98-1.20)                             |
| Psychoses                      |                 |                      |                                              |
| No                             | 600,389 (97.2%) | 1.9%                 | Reference                                    |
| Yes                            | 17,291 (2.8%)   | 1.9%                 | 0.94 (0.84-1.06)                             |
| Renal Failure                  |                 |                      |                                              |
| No                             | 401,389 (64.9%) | 1.7%                 | Reference                                    |
| Yes                            | 216,291 (35.1%) | 2.2%                 | 1.08 (1.02-1.13)                             |
| Weight Loss                    |                 |                      |                                              |
| No                             | 542,299 (87.8%) | 1.8%                 | Reference                                    |
| Yes                            | 75,381 (12.2%)  | 2.5%                 | 1.16 (1.10-1.23)                             |
| Valvular Disease               |                 |                      |                                              |
| No                             | 485,214 (78.6%) | 1.8%                 | Reference                                    |
| Yes                            | 132,466 (21.4%) | 2.3%                 | 1.07 (1.02-1.12)                             |
| Solid Tumor without Metastasis |                 |                      |                                              |
| No                             | 524,918 (85.0%) | 1.8%                 | Reference                                    |
| Yes                            | 92,762 (15.0%)  | 2.3%                 | 1.05 (0.99-1.11)                             |
| Rheumatoid Arthritis/collagen  |                 |                      |                                              |
| No                             | 569,670 (92.2%) | 1.9%                 | Reference                                    |
| Yes                            | 48,010 (7.8%)   | 2.1%                 | 1.09 (1.02-1.17)                             |
| Hospital Characteristic        |                 |                      |                                              |
| Bed Size                       |                 |                      |                                              |
| >500                           | 158.306 (25.6%) | 2.1%                 | Reference                                    |
| 350<, <=500                    | 100.925 (16.3%) | 1.9%                 | 0.95 (0.87-1.04)                             |
| 200<, <=350                    | 172.408 (27.9%) | 2.0%                 | 1.00 (0.92-1.08)                             |
| <=200                          | 186.041 (30.1%) | 1.7%                 | 0.86 (0.78-0.93)                             |
| Urban Rural indicator          |                 |                      |                                              |
| Rural                          | 93.573 (15.2%)  | 1.5%                 | Reference                                    |
| Urban                          | 524.107 (84.8%) | 2.0%                 | 1.25 (1.16-1.36)                             |
| Type of provider               |                 |                      |                                              |
| Nonprofit                      | 460.368 (74.6%) | 1.9%                 | Reference                                    |
| For profit                     | 81.732 (13.2%)  | 2.0%                 | 1.11 (1.03-1.19)                             |
| Government                     | 75.580 (12.2%)  | 1.8%                 | 0.96 (0.89-1.05)                             |
| <b>Characteristic</b>          |                 |                      |                                              |
|                                | <b>N (%)</b>    | <b>Observed rate</b> | <b>Odds Ratio* (95% Confidence Interval)</b> |
| Major                          | 121.922 (19.7%) | 2.1%                 | Reference                                    |
| Limited                        | 130.339 (21.1%) | 2.0%                 | 0.97 (0.89-1.06)                             |
| Graduate                       | 29.110 (4.7%)   | 1.8%                 | 0.87 (0.76-0.99)                             |
| No affiliation                 | 336,309 (54.5%) | 1.8%                 | 0.93 (0.85-1.01)                             |

ICU, intensive care unit; CCS, Clinical Classification Software; AIDS, acquired immune deficiency syndrome; HIV, human immunodeficiency virus.

<sup>a</sup>Odds of ICU transfer for admissions on day 4 or later as a function of the number of hospitalists providing care during the first 3 days of hospitalization, adjusted for patient characteristics and hospital characteristics, from a **two level multivariable** for 01/01/2016- 12/31/2018, 20% National Medicare data.

**Supplement Table e3. Length of Stay for Admissions<sup>a</sup>**

| Characteristic                                                                              | N (%)           | Unadjusted LOS Mean (SD) | Adjusted LOS (95% Confidence Interval) |
|---------------------------------------------------------------------------------------------|-----------------|--------------------------|----------------------------------------|
| All                                                                                         | 617,680         | 5.30 (3.69)              |                                        |
| # of generalists                                                                            |                 |                          |                                        |
| 1                                                                                           | 306,037 (49.6%) | 5.25 (3.58)              | 5.18 (5.16-5.21)                       |
| 2                                                                                           | 274,658 (44.5%) | 5.35 (3.71)              | 5.19 (5.17-5.22)                       |
| 3                                                                                           | 36,985 (6.0%)   | 5.40 (4.43)              | 5.18 (5.15-5.22)                       |
| Age (Per year)                                                                              |                 |                          |                                        |
| Q1 (>=66; <=73)                                                                             | 160,586 (26.0%) | 5.44 (3.98)              | 5.21 (5.18-5.24)                       |
| Q2 (>=74; <=80)                                                                             | 158,226 (25.6%) | 5.38 (3.89)              | 5.21 (5.18-5.24)                       |
| Q3 (>=81; <=87)                                                                             | 160,506 (26.0%) | 5.27 (3.62)              | 5.18 (5.15-5.21)                       |
| Q4 (>87)                                                                                    | 138,362 (22.4%) | 5.09 (3.15)              | 5.15 (5.12-5.18)                       |
| Education (Percent of persons age 25+ in Zip area with high school education) (Per percent) |                 |                          |                                        |
| Q1 (<=83.0)                                                                                 | 155,592 (25.2%) | 5.40 (3.80)              | 5.22 (5.19-5.25)                       |
| Q2 (>=83.1; <=89.0)                                                                         | 157,402 (25.5%) | 5.30 (3.77)              | 5.23 (5.20-5.26)                       |
| Q3 (>=89.1; <=93.1)                                                                         | 151,328 (24.5%) | 5.26 (3.72)              | 5.20 (5.17-5.22)                       |
| Q4 (>=93.2)                                                                                 | 153,358 (24.8%) | 5.25 (3.47)              | 5.09 (5.06-5.12)                       |
| Year                                                                                        |                 |                          |                                        |
| 2016                                                                                        | 195,558 (31.7%) | 5.26 (3.47)              | 5.18 (5.16-5.21)                       |
| 2017                                                                                        | 210,232 (34.0%) | 5.31 (3.68)              | 5.19 (5.16-5.21)                       |
| 2018                                                                                        | 211,890 (34.3%) | 5.33 (3.90)              | 5.19 (5.16-5.22)                       |
| Gender                                                                                      |                 |                          |                                        |
| Male                                                                                        | 255,304 (41.3%) | 5.41 (3.99)              | 5.24 (5.21-5.27)                       |
| Female                                                                                      | 362,376 (58.7%) | 5.23 (3.46)              | 5.15 (5.12-5.17)                       |
| Medicaid                                                                                    |                 |                          |                                        |
| No                                                                                          | 484,979 (78.5%) | 5.24 (3.48)              | 5.16 (5.13-5.18)                       |
| Yes                                                                                         | 132,701 (21.5%) | 5.53 (4.37)              | 5.30 (5.27-5.33)                       |
| Race                                                                                        |                 |                          |                                        |
| White                                                                                       | 516,940 (83.7%) | 5.24 (3.59)              | 5.18 (5.15-5.21)                       |

|                                                              |                    |                                 |                                               |
|--------------------------------------------------------------|--------------------|---------------------------------|-----------------------------------------------|
| Black                                                        | 54,234<br>(8.8%)   | 5.76 (4.30)                     | 5.16 (5.11-5.20)                              |
| Hispanic                                                     | 26,701<br>(4.3%)   | 5.44 (4.04)                     | 5.29 (5.26-5.33)                              |
| Other                                                        | 19,805<br>(3.2%)   | 5.48 (4.02)                     | 5.11 (5.07-5.15)                              |
| Residence prior to hospitalization                           |                    |                                 |                                               |
| Community                                                    | 562,986<br>(91.2%) | 5.25 (3.56)                     | 5.15 (5.13-5.18)                              |
| Nursing facility or other institutions                       | 54,694<br>(8.9%)   | 5.86 (4.81)                     | 5.55 (5.52-5.59)                              |
| Emergency hospitalization                                    |                    |                                 |                                               |
| No                                                           | 106,922<br>(17.3%) | 5.26 (3.85)                     | 5.23 (5.20-5.26)                              |
| Yes                                                          | 510,758<br>(82.7%) | 5.31 (3.66)                     | 5.18 (5.15-5.20)                              |
| Weekend hospitalization                                      |                    |                                 |                                               |
| No                                                           | 438,932<br>(71.1%) | 5.34 (3.72)                     | 5.22 (5.20-5.25)                              |
| Yes                                                          | 178,748<br>(28.9%) | 5.21 (3.62)                     | 5.10 (5.08-5.13)                              |
| Clinical Classification Software (CCS) code on admission     |                    |                                 |                                               |
| 102 Nonspecific chest pain                                   | 17,141<br>(2.8%)   | 4.92 (3.56)                     | 4.74 (4.69-4.78)                              |
| Characteristic                                               | <b>N (%)</b>       | <b>Unadjusted LOS Mean (SD)</b> | <b>Adjusted LOS (95% Confidence Interval)</b> |
| 106 Cardiac dysrhythmias                                     | 16,672<br>(2.7%)   | 4.97 (3.11)                     | 4.93 (4.89-4.97)                              |
| 108 Congestive heart failure; nonhypertensive                | 29,343<br>(4.8%)   | 5.57 (3.74)                     | 5.38 (5.34-5.42)                              |
| 109 Acute cerebrovascular disease                            | 14,757<br>(2.4%)   | 4.93 (3.44)                     | 4.91 (4.87-4.96)                              |
| 122 Pneumonia                                                | 43,118<br>(7.0%)   | 5.40 (3.37)                     | 5.42 (5.39-5.46)                              |
| 127 Chronic obstructive pulmonary disease and bronchiectasis | 23,103<br>(3.7%)   | 5.08 (2.91)                     | 5.10 (5.06-5.14)                              |
| 131 Respiratory failure; insufficiency                       | 11,916<br>(1.9%)   | 5.87 (4.40)                     | 5.72 (5.66-5.77)                              |
| 133 Other lower                                              | 88,615<br>(14.5%)  | 5.47 (3.51)                     | 5.32 (5.29-5.35)                              |



|                                                                     |               |                                 |                                               |
|---------------------------------------------------------------------|---------------|---------------------------------|-----------------------------------------------|
| respiratory disease                                                 |               |                                 |                                               |
| 145 Intestinal obstruction without hernia                           | 8,821 (1.4%)  | 5.26 (3.29)                     | 5.25 (5.20-5.31)                              |
| 153 Gastrointestinal hemorrhage                                     | 24,940 (4.0%) | 4.88 (3.16)                     | 4.72 (4.68-4.75)                              |
| 155 Other gastrointestinal disorders                                | 11,586 (1.9%) | 5.77 (4.21)                     | 5.56 (5.51-5.61)                              |
| 157 Acute and unspecified renal failure                             | 20,443 (3.3%) | 5.72 (4.38)                     | 5.52 (5.47-5.56)                              |
| 159 Urinary tract infections                                        | 32,008 (5.2%) | 4.97 (3.50)                     | 4.91 (4.88-4.95)                              |
| 163 Genitourinary symptoms and ill-defined conditions               | 5,556 (0.9%)  | 5.28 (4.08)                     | 5.09 (5.03-5.16)                              |
| 197 Skin and subcutaneous tissue infections                         | 19,716 (3.2%) | 5.14 (3.36)                     | 5.12 (5.08-5.16)                              |
| 2 Other skin disorders                                              | 38,449 (6.2%) | 5.98 (4.68)                     | 5.83 (5.79-5.87)                              |
| 204 Other non-traumatic joint disorders                             | 8,260 (1.3%)  | 4.60 (2.98)                     | 4.61 (4.56-4.66)                              |
| 205 Spondylosis; intervertebral disc disorders; other back problems | 9,428 (1.5%)  | 5.13 (3.53)                     | 5.10 (5.04-5.15)                              |
| 211 Other connective tissue disease                                 | 13,292 (2.2%) | 5.13 (4.57)                     | 5.05 (5.00-5.09)                              |
| 231 Other fractures                                                 | 10,181 (1.7%) | 4.53 (2.98)                     | 4.62 (4.57-4.67)                              |
| 245 Syncope                                                         | 16,212 (2.6%) | 4.73 (3.04)                     | 4.63 (4.59-4.67)                              |
| 246 Fever of unknown origin                                         | 16,008 (2.6%) | 5.48 (3.59)                     | 5.29 (5.25-5.34)                              |
| Characteristic                                                      | <b>N (%)</b>  | <b>Unadjusted LOS Mean (SD)</b> | <b>Adjusted LOS (95% Confidence Interval)</b> |
| 250 Nausea and vomiting                                             | 10,747 (1.7%) | 5.31 (3.59)                     | 5.21 (5.16-5.27)                              |
| 251 Abdominal pain                                                  | 25,465 (4.1%) | 5.29 (3.44)                     | 5.20 (5.16-5.24)                              |
| 252 Malaise and fatigue                                             | 39,663 (6.4%) | 5.23 (3.85)                     | 5.14 (5.10-5.17)                              |

|                                                               |                 |             |                  |
|---------------------------------------------------------------|-----------------|-------------|------------------|
| 55 Fluid and electrolyte disorders                            | 21,442 (3.5%)   | 5.39 (3.90) | 5.22 (5.17-5.26) |
| 59 Deficiency and other anemia                                | 7,376 (1.2%)    | 5.40 (3.83) | 5.11 (5.05-5.17) |
| 93 Conditions associated with dizziness or vertigo            | 6,343 (1.0%)    | 4.54 (3.20) | 4.51 (4.46-4.57) |
| 95 Other nervous system disorders                             | 14,815 (2.4%)   | 5.39 (4.38) | 5.22 (5.17-5.26) |
| 99 Hypertension with complications and secondary hypertension | 12,264 (2.0%)   | 5.56 (3.61) | 5.31 (5.26-5.37) |
| Elixhauser comorbidity                                        |                 |             |                  |
| Alcohol abuse                                                 |                 |             |                  |
| No                                                            | 601,762 (97.4%) | 5.29 (3.66) | 5.18 (5.16-5.21) |
| Yes                                                           | 15,918 (2.6%)   | 5.76 (4.74) | 5.28 (5.23-5.32) |
| Cardiac Arrhythmia                                            |                 |             |                  |
| No                                                            | 331,189 (53.6%) | 5.14 (3.49) | 5.14 (5.12-5.17) |
| Yes                                                           | 286,491 (46.4%) | 5.49 (3.91) | 5.24 (5.21-5.26) |
| Blood Loss Anemia                                             |                 |             |                  |
| No                                                            | 591,125 (95.7%) | 5.28 (3.67) | 5.19 (5.16-5.21) |
| Yes                                                           | 26,555 (4.3%)   | 5.72 (4.12) | 5.22 (5.18-5.26) |
| Congestive Heart Failure                                      |                 |             |                  |
| No                                                            | 379,969 (61.5%) | 5.13 (3.62) | 5.14 (5.12-5.17) |
| Yes                                                           | 237,711 (38.5%) | 5.58 (3.80) | 5.26 (5.23-5.29) |
| Chronic Obstructive Pulmonary Disease                         |                 |             |                  |
| No                                                            | 376,634 (61.0%) | 5.19 (3.66) | 5.17 (5.15-5.20) |
| Yes                                                           | 241,046 (39.0%) | 5.48 (3.73) | 5.21 (5.18-5.24) |
| Coagulopathy                                                  |                 |             |                  |
| No                                                            | 553,501 (89.6%) | 5.24 (3.62) | 5.17 (5.14-5.19) |
| Yes                                                           | 64,179 (10.4%)  | 5.87 (4.21) | 5.35 (5.32-5.38) |

|                                 |                    |                                 |                                               |
|---------------------------------|--------------------|---------------------------------|-----------------------------------------------|
| Deficiency Anemia               |                    |                                 |                                               |
| No                              | 510,324<br>(82.6%) | 5.22 (3.56)                     | 5.18 (5.15-5.20)                              |
| Yes                             | 107,358<br>(17.4%) | 5.69 (4.23)                     | 5.24 (5.21-5.27)                              |
| Depression                      |                    |                                 |                                               |
| No                              | 459,295<br>(74.4%) | 5.24 (3.56)                     | 5.19 (5.16-5.21)                              |
| Yes                             | 158,385<br>(25.6%) | 5.49 (4.03)                     | 5.18 (5.15-5.21)                              |
| Diabetes Complicated            |                    |                                 |                                               |
| No                              | 441,206<br>(71.4%) | 5.21 (3.62)                     | 5.18 (5.15-5.20)                              |
| Yes                             | 176,474<br>(28.6%) | 5.54 (3.87)                     | 5.24 (5.21-5.27)                              |
| Diabetes Uncomplicated          |                    |                                 |                                               |
| Characteristic                  | <b>N (%)</b>       | <b>Unadjusted LOS Mean (SD)</b> | <b>Adjusted LOS (95% Confidence Interval)</b> |
| No                              | 389,910<br>(63.1%) | 5.21 (3.56)                     | 5.19 (5.16-5.21)                              |
| Yes                             | 227,770<br>(36.9%) | 5.46 (3.91)                     | 5.18 (5.15-5.21)                              |
| Drug Abuse                      |                    |                                 |                                               |
| No                              | 602,863<br>(97.6%) | 5.30 (3.66)                     | 5.19 (5.16-5.21)                              |
| Yes                             | 14,817<br>(2.4%)   | 5.62 (4.71)                     | 5.14 (5.10-5.19)                              |
| Fluid and Electrolyte Disorders |                    |                                 |                                               |
| No                              | 370,102<br>(59.9%) | 5.05 (3.35)                     | 5.10 (5.08-5.13)                              |
| Yes                             | 247,578<br>(40.1%) | 5.67 (4.12)                     | 5.32 (5.29-5.34)                              |
| AIDS/HIV                        |                    |                                 |                                               |
| No                              | 616,801<br>(99.9%) | 5.30 (3.69)                     | 5.18 (5.16-5.21)                              |
| Yes                             | 879<br>(0.1%)      | 5.92 (4.13)                     | 5.07 (4.91-5.23)                              |
| Hypertension complicated        |                    |                                 |                                               |
| No                              | 389,947<br>(63.1%) | 5.12 (3.47)                     | 5.19 (5.16-5.21)                              |
| Yes                             | 227,733<br>(36.9%) | 5.62 (4.03)                     | 5.18 (5.16-5.21)                              |
| Hypertension Uncomplicated      |                    |                                 |                                               |
| No                              | 104,392<br>(16.9%) | 5.17 (3.71)                     | 5.32 (5.29-5.35)                              |
| Yes                             | 513,288<br>(83.1%) | 5.33 (3.69)                     | 5.16 (5.13-5.19)                              |
| Hypothyroidism                  |                    |                                 |                                               |

|                                         |                    |                                 |                                               |
|-----------------------------------------|--------------------|---------------------------------|-----------------------------------------------|
| No                                      | 450,545<br>(72.9%) | 5.29 (3.74)                     | 5.19 (5.17-5.22)                              |
| Yes                                     | 167,135<br>(27.1%) | 5.33 (3.57)                     | 5.17 (5.14-5.20)                              |
| Liver Disease                           |                    |                                 |                                               |
| No                                      | 583,796<br>(94.5%) | 5.27 (3.61)                     | 5.18 (5.16-5.21)                              |
| Yes                                     | 33,884<br>(5.5%)   | 5.81 (4.82)                     | 5.26 (5.22-5.30)                              |
| Lymphoma                                |                    |                                 |                                               |
| No                                      | 603,924<br>(97.8%) | 5.29 (3.68)                     | 5.18 (5.16-5.21)                              |
| Yes                                     | 13,756<br>(2.2%)   | 5.78 (4.09)                     | 5.43 (5.38-5.48)                              |
| Metastatic Cancer                       |                    |                                 |                                               |
| No                                      | 590,033<br>(95.5%) | 5.28 (3.68)                     | 5.18 (5.15-5.20)                              |
| Yes                                     | 27,647<br>(4.5%)   | 5.85 (4.00)                     | 5.43 (5.39-5.47)                              |
| Obesity                                 |                    |                                 |                                               |
| No                                      | 514,524<br>(83.3%) | 5.24 (3.65)                     | 5.17 (5.15-5.20)                              |
| Yes                                     | 103,156<br>(16.7%) | 5.62 (3.89)                     | 5.27 (5.24-5.30)                              |
| Other Neurological Disorders            |                    |                                 |                                               |
| No                                      | 501,296<br>(81.2%) | 5.22 (3.48)                     | 5.16 (5.14-5.19)                              |
| Yes                                     | 116,384<br>(18.8%) | 5.67 (4.47)                     | 5.28 (5.25-5.31)                              |
| Pulmonary Circulation Disorders         |                    |                                 |                                               |
| No                                      | 539,536<br>(87.4%) | 5.23 (3.63)                     | 5.16 (5.14-5.19)                              |
| Yes                                     | 78,144<br>(12.6%)  | 5.78 (4.04)                     | 5.34 (5.31-5.37)                              |
| Peptic Ulcer Disease excluding bleeding |                    |                                 |                                               |
| No                                      | 604,641<br>(97.9%) | 5.29 (3.68)                     | 5.19 (5.16-5.21)                              |
| Yes                                     | 13,039<br>(2.1%)   | 5.77 (4.42)                     | 5.26 (5.21-5.31)                              |
| Peripheral Vascular Disorders           |                    |                                 |                                               |
| No                                      | 434,811<br>(70.4%) | 5.23 (3.61)                     | 5.19 (5.16-5.21)                              |
| Yes                                     | 182,869<br>(29.6%) | 5.48 (3.87)                     | 5.18 (5.16-5.21)                              |
| Paralysis                               |                    |                                 |                                               |
| No                                      | 598,131<br>(96.8%) | 5.28 (3.60)                     | 5.18 (5.15-5.20)                              |
| Characteristic                          | <b>N (%)</b>       | <b>Unadjusted LOS Mean (SD)</b> | <b>Adjusted LOS (95% Confidence Interval)</b> |
| Yes                                     | 19,549<br>(3.2%)   | 5.92 (5.79)                     | 5.44 (5.39-5.48)                              |

|                                |                    |             |                  |
|--------------------------------|--------------------|-------------|------------------|
| Psychoses                      |                    |             |                  |
| No                             | 600,389<br>(97.2%) | 5.28 (3.64) | 5.18 (5.15-5.20) |
| Yes                            | 17,291<br>(2.8%)   | 5.96 (5.23) | 5.52 (5.47-5.56) |
| Renal Failure                  |                    |             |                  |
| No                             | 401,389<br>(64.9%) | 5.14 (3.48) | 5.13 (5.10-5.16) |
| Yes                            | 216,291<br>(35.1%) | 5.61 (4.04) | 5.29 (5.26-5.32) |
| Weight Loss                    |                    |             |                  |
| No                             | 542,299<br>(87.8%) | 5.21 (3.55) | 5.15 (5.12-5.17) |
| Yes                            | 75,381<br>(12.2%)  | 5.95 (4.55) | 5.48 (5.45-5.52) |
| Valvular Disease               |                    |             |                  |
| No                             | 485,214<br>(78.6%) | 5.24 (3.68) | 5.19 (5.16-5.22) |
| Yes                            | 132,466<br>(21.4%) | 5.53 (3.72) | 5.18 (5.15-5.21) |
| Solid Tumor without Metastasis |                    |             |                  |
| No                             | 524,918<br>(85.0%) | 5.26 (3.66) | 5.18 (5.15-5.20) |
| Yes                            | 92,762<br>(15.0%)  | 5.57 (3.88) | 5.23 (5.20-5.26) |
| Rheumatoid Arthritis/collagen  |                    |             |                  |
| No                             | 569,670<br>(92.2%) | 5.30 (3.71) | 5.19 (5.16-5.21) |
| Yes                            | 48,010<br>(7.8%)   | 5.36 (3.51) | 5.17 (5.13-5.20) |
| Hospital Characteristic        |                    |             |                  |
| Bed Size                       |                    |             |                  |
| >500                           | 158,306<br>(25.6%) | 5.72 (4.21) | 5.45 (5.38-5.52) |
| 350<, <=500                    | 100,925<br>(16.3%) | 5.54 (3.90) | 5.38 (5.31-5.45) |
| 200<, <=350                    | 172,408<br>(27.9%) | 5.36 (3.62) | 5.23 (5.18-5.28) |
| <=200                          | 186,041<br>(30.1%) | 4.90 (2.94) | 4.84 (4.80-4.88) |
| Urban Rural indicator          |                    |             |                  |
| Rural                          | 93,573<br>(15.2%)  | 4.82 (2.75) | 4.91 (4.86-4.95) |
| Urban                          | 524,107<br>(84.8%) | 5.43 (3.79) | 5.24 (5.21-5.26) |
| Type of provider               |                    |             |                  |
| Nonprofit                      | 460,368<br>(74.6%) | 5.35 (3.68) | 5.18 (5.15-5.21) |

|                               |                    |             |                  |
|-------------------------------|--------------------|-------------|------------------|
| For profit                    | 81,732<br>(13.2%)  | 5.30 (3.46) | 5.23 (5.17-5.29) |
| Government                    | 75,580<br>(12.2%)  | 5.28 (3.62) | 5.18 (5.13-5.24) |
| Medical School<br>Affiliation |                    |             |                  |
| Major                         | 121,922<br>(19.7%) | 5.73 (4.28) | 5.40 (5.34-5.47) |
| Limited                       | 130,339<br>(21.1%) | 5.42 (3.82) | 5.24 (5.19-5.30) |
| Graduate                      | 29,110<br>(4.7%)   | 5.49 (3.71) | 5.32 (5.20-5.44) |
| No affiliation                | 336,309<br>(54.5%) | 5.15 (3.30) | 5.08 (5.04-5.11) |

LOS, length of stay; SD, standard deviation; AIDS, acquired immune deficiency syndrome; HIV, human immunodeficiency virus.

<sup>a</sup>Length of stay for admissions on day 4 or later as a function of the number of hospitalists providing care during the first 3 days of hospitalization, adjusted for patient characteristics, from a **two level multivariable** in Model 2 (for the period 01/01/2016 to 12/31/2018, 20% National Medicare data).
